# Supplementary material for: Relationships between Circulating Biomarkers and Body Composition Parameters in Patients with Metabolic Syndrome: A Community-Based Study
Source: MDPI journal article supplement (doi:10.3390/ijms25020881), 2024-01-10
Supplement: s1 [file s1]

**Table S1.** Pearson correlations between body composition parameters and plasma levels of soluble markers in the study sample, in men and women separately; male correlations are shown above the diagonal and female below. All the variables were adjusted for age prior the analysis.

|             | BMI                | WHR                | FM/WT              | SMM/WT             | ECW/ICW            | GDF-15             | Chemerin           | Adiponectin        | Adipsin            | Follistatin        | Leptin             | L/A ratio          | MHR                |
|-------------|--------------------|--------------------|--------------------|--------------------|--------------------|--------------------|--------------------|--------------------|--------------------|--------------------|--------------------|--------------------|--------------------|
| BMI         |                    | 0.51 <sup>2</sup>  | 0.76 <sup>2</sup>  | -0.77 <sup>2</sup> | 0.01 <sup>n</sup>  | 0.06 <sup>n</sup>  | 0.31 <sup>2</sup>  | -0.17 <sup>2</sup> | 0.13 <sup>2</sup>  | 0.08 <sup>n</sup>  | 0.67 <sup>2</sup>  | 0.58 <sup>2</sup>  | 0.17 <sup>2</sup>  |
| WHR         | 0.27 <sup>2</sup>  |                    | 0.46 <sup>2</sup>  | -0.45 <sup>2</sup> | 0.30 <sup>2</sup>  | 0.05 <sup>n</sup>  | 0.20 <sup>2</sup>  | -0.20 <sup>2</sup> | 0.01 <sup>n</sup>  | 0.07 <sup>n</sup>  | 0.41 <sup>2</sup>  | 0.37 <sup>2</sup>  | 0.15 <sup>2</sup>  |
| FM/WT       | 0.80 <sup>2</sup>  | 0.23 <sup>2</sup>  |                    | -0.96 <sup>2</sup> | 0.26 <sup>2</sup>  | 0.14 <sup>2</sup>  | 0.30 <sup>2</sup>  | -0.09 <sup>1</sup> | 0.11 <sup>1</sup>  | 0.04 <sup>n</sup>  | 0.68 <sup>2</sup>  | 0.52 <sup>2</sup>  | 0.18 <sup>2</sup>  |
| SMM/WT      | -0.67 <sup>2</sup> | -0.21 <sup>2</sup> | -0.93 <sup>2</sup> |                    | -0.20 <sup>2</sup> | -0.12 <sup>1</sup> | -0.29 <sup>2</sup> | 0.13 <sup>2</sup>  | -0.08 <sup>n</sup> | -0.05 <sup>n</sup> | -0.69 <sup>2</sup> | -0.50 <sup>2</sup> | -0.18 <sup>2</sup> |
| ECW/ICW     | 0.15 <sup>2</sup>  | 0.12 <sup>2</sup>  | 0.29 <sup>2</sup>  | -0.23 <sup>2</sup> |                    | 0.33 <sup>2</sup>  | 0.16 <sup>2</sup>  | 0.20 <sup>2</sup>  | 0.15 <sup>2</sup>  | 0.03 <sup>n</sup>  | 0.07 <sup>n</sup>  | 0.03 <sup>n</sup>  | 0.07 <sup>n</sup>  |
| GDF-15      | 0.11 <sup>1</sup>  | 0.12 <sup>2</sup>  | 0.13 <sup>2</sup>  | -0.09 <sup>1</sup> | 0.23 <sup>2</sup>  |                    | 0.22 <sup>2</sup>  | -0.03 <sup>n</sup> | 0.15 <sup>2</sup>  | 0.05 <sup>n</sup>  | 0.09 <sup>1</sup>  | 0.14 <sup>2</sup>  | 0.15 <sup>2</sup>  |
| Chemerin    | 0.28 <sup>2</sup>  | 0.12 <sup>2</sup>  | 0.28 <sup>2</sup>  | -0.26 <sup>2</sup> | 0.13 <sup>2</sup>  | 0.24 <sup>2</sup>  |                    | -0.06 <sup>n</sup> | 0.18 <sup>2</sup>  | 0.16 <sup>2</sup>  | 0.38 <sup>2</sup>  | 0.30 <sup>2</sup>  | 0.20 <sup>2</sup>  |
| Adiponectin | -0.16 <sup>2</sup> | -0.18 <sup>2</sup> | -0.06 <sup>n</sup> | 0.06 <sup>n</sup>  | 0.17 <sup>2</sup>  | 0.03 <sup>n</sup>  | -0.03 <sup>n</sup> |                    | 0.09 <sup>1</sup>  | 0.00 <sup>n</sup>  | -0.06 <sup>n</sup> | -0.36 <sup>2</sup> | -0.19 <sup>2</sup> |
| Adipsin     | 0.18 <sup>2</sup>  | -0.00 <sup>n</sup> | 0.19 <sup>2</sup>  | -0.11 <sup>2</sup> | 0.20 <sup>2</sup>  | 0.18 <sup>2</sup>  | 0.14 <sup>2</sup>  | 0.13 <sup>2</sup>  |                    | 0.06 <sup>n</sup>  | 0.25 <sup>2</sup>  | 0.15 <sup>2</sup>  | 0.09 <sup>n</sup>  |
| Follistatin | 0.05 <sup>n</sup>  | -0.02 <sup>n</sup> | 0.08 <sup>n</sup>  | -0.08 <sup>n</sup> | 0.14 <sup>2</sup>  | 0.17 <sup>2</sup>  | 0.20 <sup>2</sup>  | 0.06 <sup>n</sup>  | 0.04 <sup>n</sup>  |                    | 0.04 <sup>n</sup>  | 0.04 <sup>n</sup>  | 0.03 <sup>n</sup>  |
| Leptin      | 0.53 <sup>2</sup>  | 0.12 <sup>2</sup>  | 0.58 <sup>2</sup>  | -0.55 <sup>2</sup> | 0.12 <sup>2</sup>  | 0.15 <sup>2</sup>  | 0.35 <sup>2</sup>  | 0.01 <sup>n</sup>  | 0.25 <sup>2</sup>  | 0.11 <sup>1</sup>  |                    | 0.72 <sup>2</sup>  | 0.15 <sup>2</sup>  |
| L/A ratio   | 0.48 <sup>2</sup>  | 0.16 <sup>2</sup>  | 0.44 <sup>2</sup>  | -0.42 <sup>2</sup> | 0.00 <sup>n</sup>  | 0.07 <sup>n</sup>  | 0.30 <sup>2</sup>  | -0.50 <sup>2</sup> | 0.14 <sup>2</sup>  | 0.05 <sup>n</sup>  | 0.72 <sup>2</sup>  |                    | 0.22 <sup>2</sup>  |
| MHR         | 0.18 <sup>2</sup>  | 0.11 <sup>2</sup>  | 0.16 <sup>2</sup>  | -0.12 <sup>2</sup> | -0.01 <sup>n</sup> | 0.16 <sup>2</sup>  | 0.15 <sup>2</sup>  | -0.20 <sup>2</sup> | 0.11 <sup>2</sup>  | 0.15 <sup>2</sup>  | 0.15 <sup>2</sup>  | 0.23 <sup>2</sup>  |                    |

BMI, body mass index; WHR, waist-to-hip ratio; FM/WT, fat mass/weight ratio; SMM/WT, skeletal muscle mass/weight ratio; ECW/ICW, extracellular water / intracellular water ratio; L/A ratio, leptin/ adiponectin ratio; MHR, monocyte to high-density lipoprotein cholesterol ratio.

<sup>1</sup> $p < .05$ ; <sup>2</sup> $p < .01$ ; <sup>n</sup> $p > .05$
